# Supplementary material
Source: publisher site journal article supplement (https://www.spandidos-publications.com/1431/downloadSupplementary)

Figure S1. (A) Geometric structure and (B) specific parameters of the novel intramedullary nail.

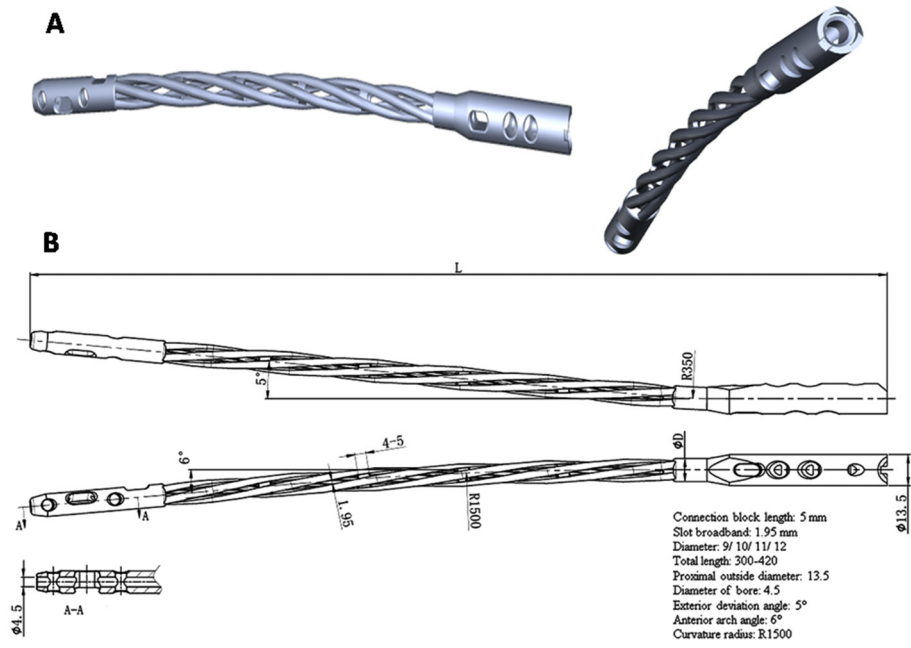

Supplement: Supplementary file 1 [file downloadSupplementary]
